# Supplementary material for: Activity enhancement of zeolite MCM-22 by interlayer expansion enabling higher Ce loading and room temperature CO oxidation
Source: Royal Society of Chemistry journal article supplement (doi:10.1039/c4ta03308f), 2014-08-08
Supplement: c4ta03308f1.pdf [file c4ta03308f1.pdf]

## Experimental Section Details

The precursor, MCM-22P and high Al-MWW zeolite (MCM-56/49) were prepared according to the published procedures [P. Chlubna, W. J. Roth, A. Zukal, M. Kubu and J. Pavlatova, *Catal. Today*, 2012, 179, 35–42 and A. S. Fung, S. L. Lawton and W. J. Roth, US Pat., 5,362,697, 1994] using gels comprising Ultrasil (Evonik), sodium aluminate (Riedel-del-Haen), 50% NaOH and hexamethyleneimine (HMI, Sigma Aldrich). The following molar ratios were used: MCM-22P - Si/Al = 25, OH/Si = 0.15, HMI/Si = 0.35 and water/Si = 19.3; MCM-56/49 - Si/Al = 12, OH/Si = 0.19, HMI/Si = 0.35 and water/Si = 19.2. The gels were crystallized at 170°C for 36 hrs and at 143°C for 60 hrs, respectively.

The silylation to produce the IEZ derivative was carried out in a Teflon lined 25 mL Parr reactor according to [P. Wu, J. F. Ruan, L. L. Wang, L. L. Wu, Y. Wang, Y. M. Liu, W. B. Fan, M. Y. He, O. Terasaki and T. Tatsumi, *J. Am. Chem. Soc.*, 2008, 130, 8178-8187]. The reagents were added successively: 10 mL of 1 M HNO<sub>3</sub> (POCh, analytical grade), 0.12 mL CH<sub>3</sub>Si(OCH<sub>2</sub>CH<sub>3</sub>)<sub>2</sub> (Sigma Aldrich), and 0.5g of the MCM-22P precursor. The mixture was homogenized by stirring, sealed, heated to 170°C and held for 10h. The slurry was filtered and the solid washed several times with distilled water. Subsequent calcination was carried out in air at 540°C for 6 h in a muffle furnace and temperature ramp of 2°C/min. The sample was ion exchanged 3 times with 0.5 M solution of NH<sub>4</sub>NO<sub>3</sub> (POCh, analytical grade) for 1 h at RT.

Cerium and lanthanum forms for all samples were prepared by ion-exchange with 0.1 M Ce(NO<sub>3</sub>)<sub>3</sub>/La(NO<sub>3</sub>)<sub>3</sub> solutions (Sigma Aldrich, analytical grade) at 85°C, filtered, washed with distilled water and dried at room temperature.

Zeolite samples were characterized by X-ray powder diffraction (XRD) using a Philips X'Pert diffractometer APD with CuK $\alpha$  radiation ( $\lambda = 0.154$  nm) in the range 5-50° 2 $\theta$  with steps of 0.02°. Samples for XRD were used in three distinct forms: 1. as-synthesized, 2. calcined, and 3. additionally activated under the same condition as used for IR measurement.

The nitrogen adsorption isotherms were determined at -196°C (liquid nitrogen temperature) using an ASAP 2025 (Micromeritics) static volumetric apparatus. Before adsorption experiments the sample was outgassed at 200°C overnight using turbomolecular pump to remove pre-adsorbed water.

The coordination, oxidation state and aggregation of cerium introduced into MWW zeolites were studied by UV-Vis-DRS method using an Evolution 600 (Thermo) spectrophotometer. The measurements were performed at room temperature in the range 200–900 nm with resolution of 2 nm.

Temperature programmed reduction, using H<sub>2</sub> as the reducing agent was carried out in a modified gas chromatograph with a thermal conductivity detector (TCD). Purified mixture of N<sub>2</sub>/H<sub>2</sub> (95/5 vol.%, Air Liquide) served as a combined carrier and reducing gas at a total flow rate 30 cm<sup>3</sup>min<sup>-1</sup>. Before experiment the catalyst sample (100 mg) was preheated in a dry He stream at 250 °C for 60 min, and then cooled to 100 °C. The sample was heated at 10 °C min<sup>-1</sup> to the final temperature of 650 °C. The H<sub>2</sub> consumption was measured by a thermal conductivity detector.

The materials were investigated by adsorption of CO and pyridine used as probe molecules followed by FTIR spectroscopy. All samples were activated in the form of self-supporting wafers for 1 hour at

450 °C prior to the adsorption of probe molecules. The adsorption temperatures were as follows: 170 °C for pyridine (POCh Gliwice, analytical grade) and -100 °C for CO (Linde Gas Polska, 99.95% used without further purification). IR spectra were recorded with a Bruker Tensor 27 spectrometer equipped with an MCT detector and working with the spectral resolution of 2 cm<sup>-1</sup>. All spectra presented in this work have been normalized to the standard 10 mg pellet (density 3.2 mg/cm<sup>2</sup>).

The reference Ce<sub>2</sub>O<sub>3</sub> and CeO<sub>2</sub> spectra were obtained with commercial samples from Merck and Rhodia, respectively.

#### Additional data on H<sub>2</sub>-TPR for Ce-MWW

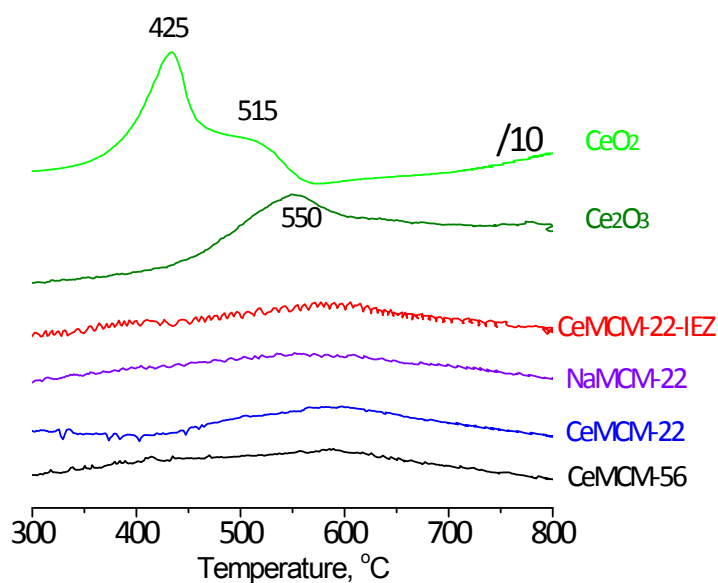

**Figure S1.** H<sub>2</sub>-TPR profiles (dependence of TCD signal in arbitrary units on temperature) for cerium-MWW zeolites under study, together with NaMCM-22 and commercial Ce<sub>2</sub>O<sub>3</sub> and CeO<sub>2</sub>. Profile for Ce<sub>2</sub>O<sub>3</sub> is divided by 10.

During thermoprogrammed reduction (H<sub>2</sub>-TPR) two peaks appear for commercial CeO<sub>2</sub>: at 425 and 515 °C. According to *S. Watanabe, X. Ma, and Ch. Song, J. Phys. Chem. C 2009, 113, 14249–14257* they correspond to the reduction of surface oxygen and bulk oxygen, respectively. A small peak at 550 °C for Ce<sub>2</sub>O<sub>3</sub> may result from the reduction of a small amount of surface oxygen defects. The H<sub>2</sub>-TPR profiles of cerium-exchanged zeolites show negligible consumption of hydrogen. This is in accordance with the XRD data, showing no presence of detectable cerium oxide particles. Therefore it is possible that oxide-like clusters are either too small to give observable hydrogen consumption or they may be formed by partially binding to framework oxygen atoms, which are not so easily reducible.

## Additional data on CO adsorption on La-MWW

The participation and significance of Ce(+) is supported by parallel studies with La-substituted MWW materials, where 3+ to 4+ metal oxidation is not viable. Brønsted acid site concentrations showed similar trends like Ce – slight increase for La-MCM-22 and La-MCM-56/49 with significant drop for La-MCM-22-IEZ. The FTIR spectra for adsorbed CO are shown in Figure S2.

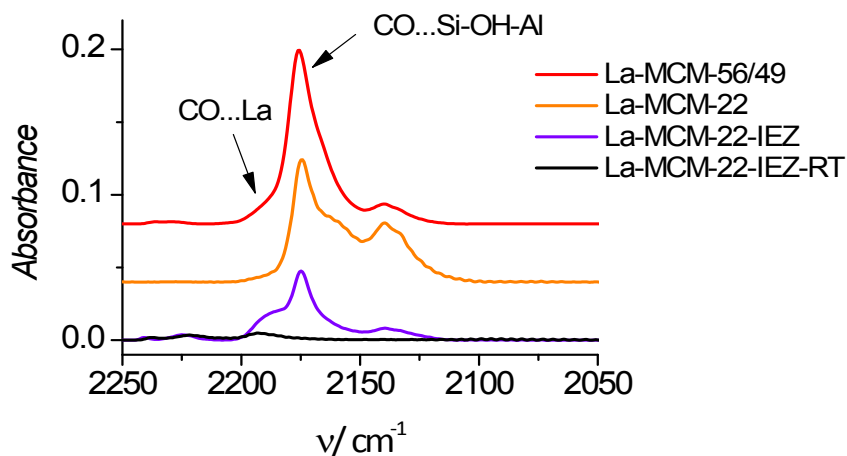

**Figure S2.** IR spectra of CO adsorbed at -100°C on lanthanum-exchanged zeolites (except La-MCM-IEZ-RT recorded at RT).

Only La-MCM-22-IEZ show significant uptake of CO at low temperature. The adsorption of CO by La-MCM-56/49 is barely noticeable (slight shoulder of CO-OH band) and not detectable with La-MCM-22. There are no bands due to CO adsorbed the zeolite samples at room temperature and no sign of oxidation to CO<sub>2</sub>. These results are important in supporting the critical role of redox metal centers exemplified by Ce in contrast to La.

XRD patterns for MWW zeolites together with  $\text{CeO}_2$  and  $\text{Ce}_2\text{O}_3$ .

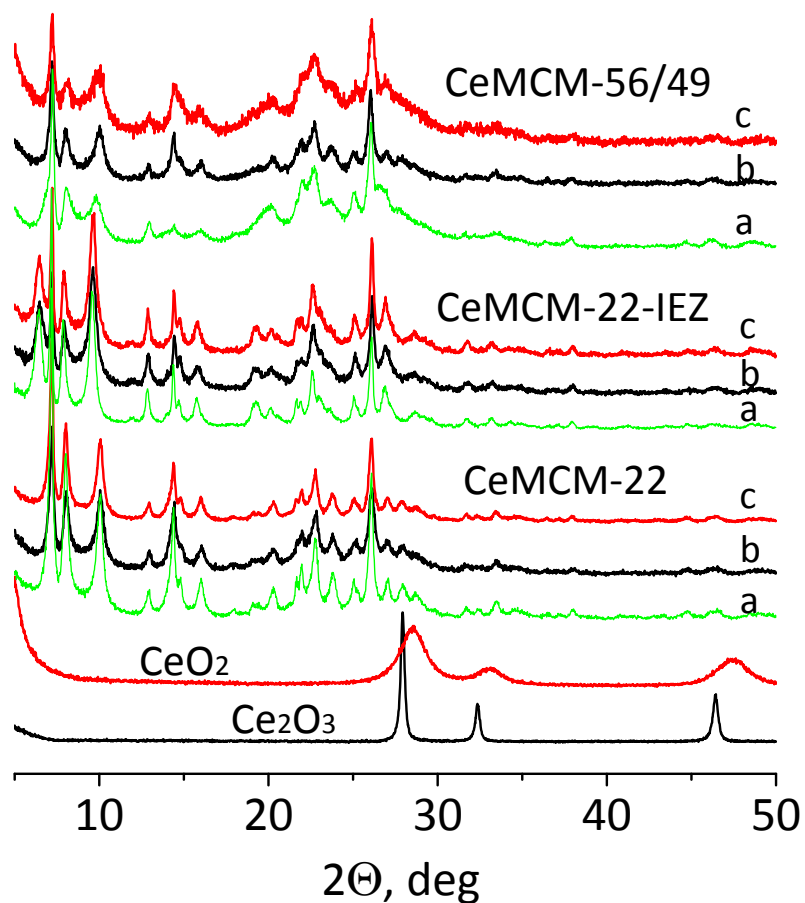

**Figure S3** XRD patterns for  $\text{CeO}_2$  and  $\text{Ce}_2\text{O}_3$  (divided by 5) and MCM-22, MCM-22-IEZ and MCM-56/49 zeolites, a – as synthesized and calcined (no ion-exchange), b – calcined and cerium-exchanged, c – calcined, cerium-exchanged and vacuum activated samples.

The XRD patterns show no presence of either  $\text{CeO}_2$  or  $\text{Ce}_2\text{O}_3$  oxides suggesting that the size of formed oxide-like clusters are below detection limit for this method. Region  $5\text{-}50^\circ$   $2\theta$  was used because higher reflections for cerium oxides are even less intensive for commercial samples containing micrometric size crystals and should not be present in smaller crystallites.
